# Supplementary material for: Body odour disgust sensitivity predicts authoritarian attitudes
Source: PubMed Central journal article supplement (PMC5830723; doi:10.1098/rsos.171091), 2018-02-28
Supplement: rsos171091supp1.pdf [file rsos171091supp1.pdf]

**Body odor disgust sensitivity predicts authoritarian attitudes.**

**Supplementary Information.**

|           | N   | Mean  | SD    | Min  | Median | Max  | Skewness | Kurtosis |
|-----------|-----|-------|-------|------|--------|------|----------|----------|
| Age       | 199 | 33.13 | 10.37 | 19   | 30     | 68   | 7.13     | 3.12     |
| Education | 201 | 4.59  | 1.28  | 1    | 5      | 8    | -3.87    | 0.66     |
| TDD.pat   | 201 | 4.40  | 1.10  | 1.7  | 4.4    | 6.9  | -0.55    | -1.63    |
| BODS      | 200 | 3.27  | 0.82  | 1.25 | 3.25   | 5    | -0.73    | -1.08    |
| RWA       | 201 | 3.67  | 1.11  | 1    | 4      | 6.07 | -3.49    | -0.47    |
| SocCons   | 201 | 3.13  | 1.51  | 1    | 3      | 7    | 3.14     | -0.77    |
| MorCons   | 201 | 3.31  | 1.52  | 1    | 3      | 7    | 2.52     | -1.24    |
| FiscCons  | 201 | 3.59  | 1.53  | 1    | 4      | 7    | 1.36     | -1.64    |

Table S1. Descriptives of the measures used in Study 1. TDD.pat = Pathogen Subscale of the Three Domains of Disgust; BODS = Body Odor Disgust Scale; RWA = Right Wing Authoritarianism; SocCons = Social Conservatism; MorCons = Moral Conservatism; FiscCons = Fiscal Conservatism.

|           | N   | Mean  | SD    | Min  | Median | Max  | Skewness | Kurtosis |
|-----------|-----|-------|-------|------|--------|------|----------|----------|
| Age       | 158 | 35.11 | 11.88 | 18   | 31     | 74   | 5.40     | 0.98     |
| Education | 159 | 4.17  | 1.36  | 1    | 4      | 8    | -0.10    | -1.29    |
| DSR       | 159 | 2.95  | 0.64  | 1.28 | 2.96   | 4.92 | 0.63     | -0.18    |
| TDD.pat   | 159 | 4.64  | 1.13  | 1.71 | 4.71   | 7    | -1.32    | -0.95    |
| PVD.germ  | 161 | 4.33  | 0.65  | 1    | 4.29   | 7    | -1.86    | 12.49    |
| BODS      | 159 | 2.88  | 0.75  | 1.25 | 2.82   | 4.92 | 2.63     | -0.09    |
| RWA       | 159 | 3.00  | 1.22  | 1    | 2.87   | 6.27 | 1.36     | -1.92    |

Table S2. Descriptives of the measures used in Study 2. TDD.pat = Pathogen Subscale of the Three Domains of Disgust; BODS = Body Odor Disgust Scale; RWA = Right Wing Authoritarianism; DSR = Disgust Sensitivity Revised; PVD.germ = Germ aversion subscale of the Perceived Vulnerability to Disease.

|                   | N   | Mean  | SD    | Min | Median | Max  | Skewness | Kurtosis |
|-------------------|-----|-------|-------|-----|--------|------|----------|----------|
| Age               | 391 | 37.45 | 12.19 | 19  | 35     | 75   | 6.97     | 0.31     |
| EDU               | 391 | 6.23  | 1.41  | 3   | 7      | 10   | 0.38     | -1.95    |
| BODS              | 391 | 3.17  | 0.80  | 1   | 3.17   | 5    | 0.34     | -1.24    |
| RWA               | 391 | 3.26  | 1.30  | 1   | 3.4    | 6.67 | 0.93     | -2.77    |
| SDO               | 391 | 2.35  | 1.32  | 1   | 2      | 7    | 7.09     | 0.99     |
| Attitudes.Trump   | 390 | 28.78 | 35.58 | 0   | 6.835  | 100  | 6.89     | -3.55    |
| Attitudes.Clinton | 390 | 43.44 | 36.46 | 0   | 42.165 | 100  | 1.21     | -6.21    |

Table S3. Descriptives of the measures used in Study 3. BODS = Body Odor Disgust Scale; RWA = Right Wing Authoritarianism; SDO = Social Dominance Orientation; Att. Clinton = Positive attitudes towards Hillary Clinton; Att. Trump = Positive attitudes towards Donald Trump.
